# Supplementary material
Source: Springer Nature journal article supplement (https://www.springermedizin.de/resource/supplementary/12936_2011_1753_MOESM9_ESM.pdf/9541658)

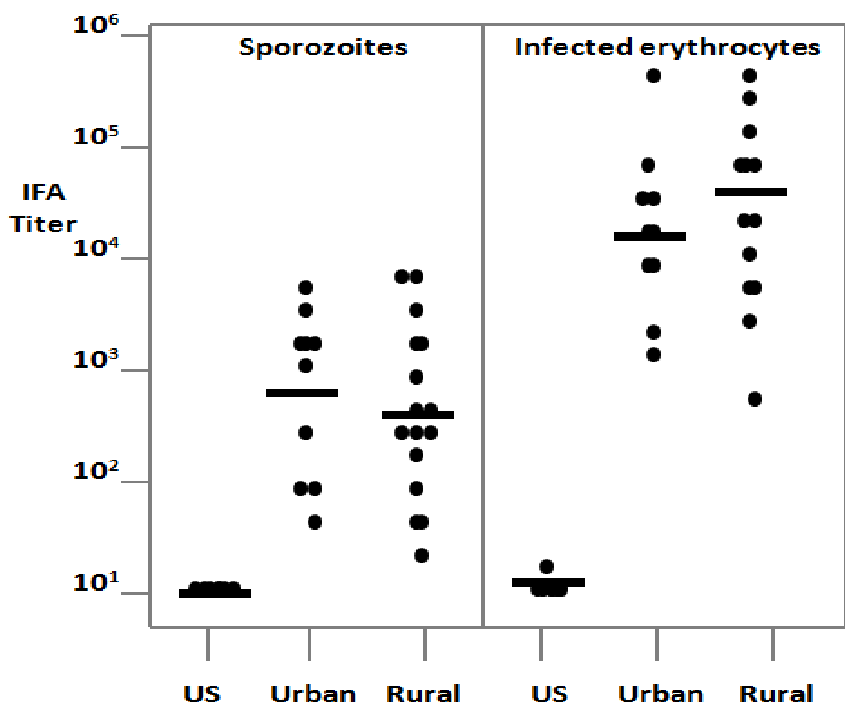

Supplement: MOESM9 [file 9541658]
